# Supplementary material for: Isolation of a multipotent mesenchymal stem cell-like population from human adrenal cortex
Source: PubMed Central journal article supplement (PMC5919938; doi:10.1530/ec-18-0067), 2018-04-05
Supplement: ec-7-617-t002.pdf [file ec-7-617-t002.pdf]

**Table 2. Unconjugated and conjugated primary antibodies used in flow cytometry**

| <b>Primary antibody</b>                                                           | <b>Source</b>               | <b>Dilution</b>    | <b>Catalogue number</b> |
|-----------------------------------------------------------------------------------|-----------------------------|--------------------|-------------------------|
| <b><u>Unconjugated primary antibody</u></b>                                       |                             |                    |                         |
| <b>DAX1 rabbit IgG</b>                                                            | Abcam                       | 1:10<br>(40 µg/ml) | Ab97369                 |
| <b>GLI rabbit IgG</b>                                                             | Santa Cruz<br>Biotechnology | 1:10<br>(20 µg/ml) | SC20687                 |
| <b>MSC antibody panel (CD19, CD44, CD45, CD90, CD105, CD106, CD166 mouse IgG)</b> | R&D system                  | 1:1<br>(100 µg/ml) | SC017                   |
| <b><u>Conjugated primary antibody</u></b>                                         |                             |                    |                         |
| <b>MHC I HLA-ABC Antibody, FITC conjugate</b>                                     | Thermo<br>Scientific        | 1:1<br>(100µg/ml)  | MA1-80454               |
| <b>MHC II HLA-DR Antibody, FITC conjugate</b>                                     | Thermo<br>Scientific        | 1:1<br>(100µg/ml)  | MA1-19620               |
| <hr/>                                                                             |                             |                    |                         |
| <b>Secondary antibody</b>                                                         | <b>Source/manufacture</b>   | <b>Dilution</b>    | <b>Catalogue number</b> |
| <b>APC-conjugated goat anti-rabbit IgG</b>                                        | Santa Cruz<br>Biotechnology | 1:100              | SC3846                  |
| <b>FITC-conjugated goat anti-mouse IgG</b>                                        | Sigma Aldrich               | 1:100              | F2653                   |
